# Supplementary material for: Quality Index Approach for Analysis of Urban Green Infrastructure in Himalayan Cities
Source: MDPI journal article supplement (doi:10.3390/land12020279), 2023-01-18
Supplement: s1 [file s1]

## Supplementary Materials

### 1. Image pre-processing, classification and accuracy assessment

#### 1.1. Image pre-processing and extraction of major land use and land cover classes

To capture the landscape characteristics of UGI for the year 2019, Sentinel-2 satellite images, obtained from European Space Agency's (ESA) Copernicus open access hub (ESA, 2020) were used as the fundamental spatial data source. Figure S1 shows the flow-diagram of the adopted methodology. We used Level-2A images which are atmospherically corrected Bottom Of Atmosphere (BOA) reflectance images (details of the acquired images in Table S2). With its 13 spectral bands (four bands at 10 m, six bands at 20 m and three bands at 60 m spatial resolution) Sentinel-2 multispectral imager (MSI) provides enhanced spatial and spectral capabilities for land cover mapping. Especially for vegetation mapping, we included four red-edge (RE) bands of Sentinel-2 which are sensitive to vegetation classes influenced by chlorophyll content and canopy reflectance (Sun et al., 2020). By doing so we considered the red-edge bands that improved the vegetation classification, the overall classification accuracy as well as the Kappa coefficient. In addition, the short-wave infrared (SWIR) bands are known to have strong reflectance from urban land cover and thus help in separating them from agricultural land (Lefebvre, Sannier, & Corpetti, 2016).

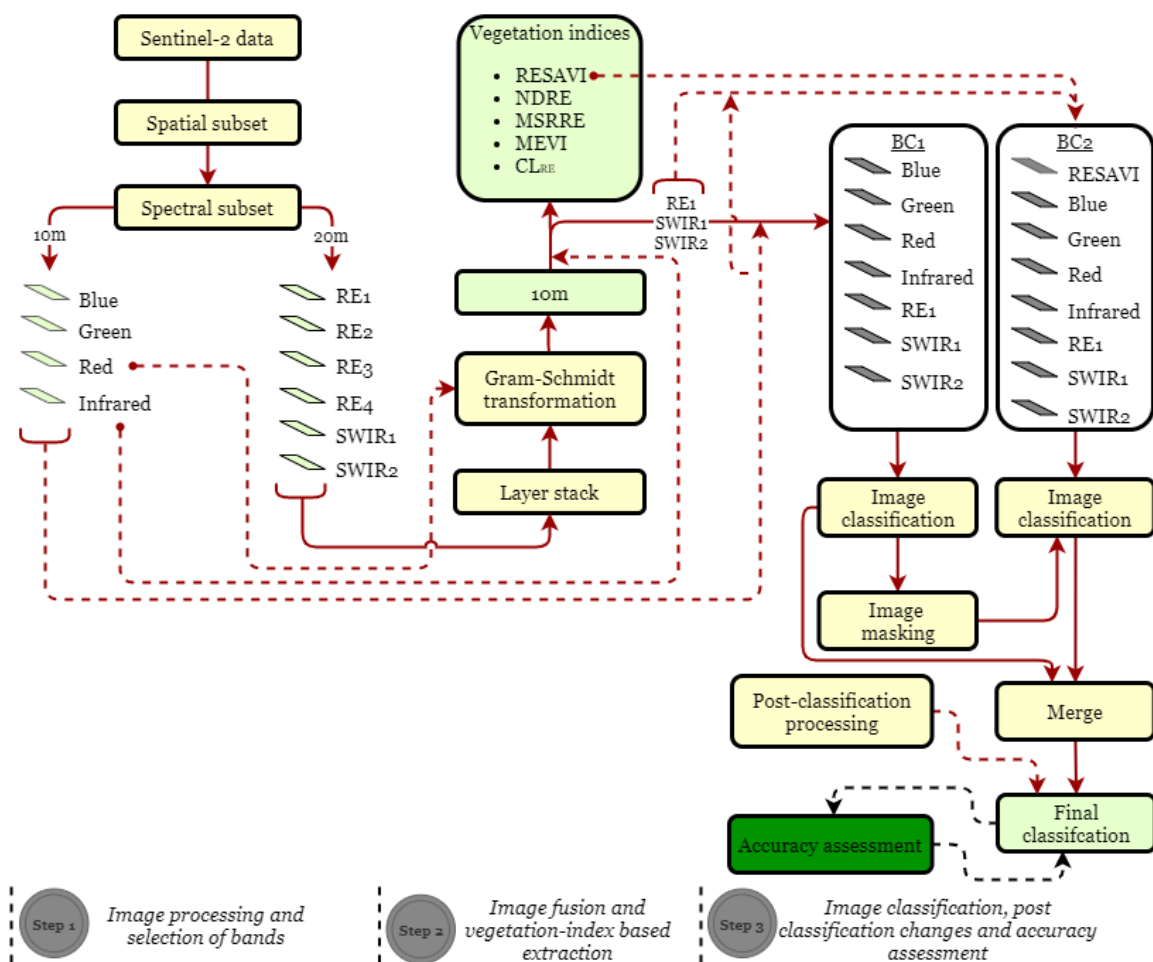

Figure S1 Image classification methodology flow diagram.  
RE – Red-edge; BC – Band combination; SWIR - Short Wave Infrared.

Table S1 Description of the selected cities.

| City            | State/Region      | Altitude (msl) | Population* | Area (km <sup>2</sup> ) | Wards | Physical and cultural features                                                                                                                                                                                                                                                                                       |
|-----------------|-------------------|----------------|-------------|-------------------------|-------|----------------------------------------------------------------------------------------------------------------------------------------------------------------------------------------------------------------------------------------------------------------------------------------------------------------------|
| <b>Srinagar</b> | Jammu and Kashmir | 1580           | 1,180,570   | 245                     | 69    | Well-known for its gardens and famous wetland <i>Dal</i> . The outer fringes of the city are composed of agroforestry and agriculture along the fertile plains of Jhelum river. Restricted by mountains in the north-east. Largest urban settlement in the Himalayan mountain chain.                                 |
| <b>Shimla</b>   | Himachal Pradesh  | 2,276          | 169,578     | 28                      | 25    | A popular tourist destination, particularly in summer months. Topography is dominated by hilly forests which restrict the city to be concentrated on different mountainous peaks, connected by road network.                                                                                                         |
| <b>Dehradun</b> | Uttarakhand       | 650            | 574,840     | 66                      | 60    | A number of educational and professional training centers of national importance are located here. Thus hold maintained, but restricted UGI classes. Landscape includes remnant foothill forest patches and ousted agricultural patches due to rapid urban growth after turning into a capital city in the year 2000 |

\*Source- Register General of India, 2011

Table S2 Details of satellite data used.

| Date                       | Year | City     | Satellite sensor |
|----------------------------|------|----------|------------------|
| 18 <sup>th</sup> September | 2019 | Srinagar | Sentinel-2A MSI  |
| 17 <sup>th</sup> October   | 2019 | Dehradun | Sentinel-2B MSI  |
| 27 <sup>th</sup> October   | 2019 | Shimla   | Sentinel-2A MSI  |

Table S3 Selected landscape metrics and their description after McGarrial & Marks, 1995; McGarigal, 2015. For formula and range, see Supplementary table A4.

| Landscape metrics                                          | Measured attribute | Description                                                                                                                                                                                         |
|------------------------------------------------------------|--------------------|-----------------------------------------------------------------------------------------------------------------------------------------------------------------------------------------------------|
| Largest Patch Index (LPI)                                  | Area               | Measure of the dominance of largest patch. The percentage approaches 100 when the class occupies larger continuous area.                                                                            |
| Mean Patch Size (AREA_MN)                                  | Area               | Average area of all the patches in a class in a given area. Directly dependent on number of patches. To be interpreted in conjunction with PD.                                                      |
| Edge Density (ED)                                          | Shape              | Measures shape complexity on the basis of total edge length of the class per unit area. Higher value indicates increased complexity in the shape.                                                   |
| Landscape Shape Index (LSI)                                | Shape              | Measures shape complexity on the basis of perimeter-area ratio of class in the landscape. Higher value indicates increased irregularity in the shape.                                               |
| Area-Weighted Mean Patch Shape Fractal Dimension (FRAC_AM) | Shape              | Measures shape complexity on the basis of relative patch area by weighting patches according to their size. Higher value indicates increased complexity and fragmentation of the patches.           |
| Contiguity Index (CONTIG)                                  | Shape              | Measures the spatial connectedness of the patches in such a way that a shape which results in more connections between the cells of a patch leads to a higher contiguity value.                     |
| Mean Euclidean nearest-neighbour distance (ENN_MN)         | Aggregation        | Measures the isolation aspect of the fragmentation and provides a measure of the shortest Euclidian neighbour distance. Higher values indicate farther patch distance of the class.                 |
| Effective Mesh Size (MESH)                                 | Aggregation        | Measures of aggregation of patches in terms of area such that total landscape area is considered for the proportional area of each patch, thus providing a relative measure of the patch structure. |
| Patch Density (PD)                                         | Aggregation        | Measures the number of patches of the class per unit area. Higher value generally denotes higher heterogeneity. To be interpreted in conjunction with other metrics                                 |

### 1.2. Image fusion and vegetation index based extraction

Red-edge bands (RE 1, RE 2 and RE 3) and SWIR (SWIR 1 and SWIR 2) have a spatial resolution of 20 m as compared to 10 m in visible and near infrared (NIR). Thus, five bands at 20 m resolution were resampled to 10 m using the Gram-Schmidt (GS) transformation algorithm where one band owning the higher spatial resolution was used to fuse the other lower resolution band set. GS transformation is one of the component substitution approaches for image fusion (Wang, Shi, Li, & Atkinson, 2016) which uses averaging of multispectral bands and their spectral response function to downscale. It simulates the panchromatic band from lower spatial resolution and applies the inverse GS transform to form a pan-sharpened band. With varied wavelength ranges (Table S4), RE bands provide different spectral

information for land cover classification, and thus it was important to identify the most suitable one. To do so, we employed different vegetation indices based on RE bands to test the suitability of RE band in extracting vegetation classes such as Red Edge Chlorophyll Index ( $CL_{RE}$ ), Normalized Difference Red Edge (NDRE), Red Edge Soil Adjusted Vegetation Index (RESAVI), Modified Red Edge Simple Ratio (MSRRE), and Modified Enhanced Vegetation Index (MEVI) (see Cao et al., 2013 for formula). RESAVI, which corrects the influence of background soil and utilizes the advantages of RE bands to appropriately extract vegetation classes, was selected further after comparison of indices. Among the three RE bands, RE 1 performed the best to differentiate vegetation classes across the study area and was thus chosen for further analysis. This analysis was carried out in ERDAS Imagine 2020.

Table S4 Details of Sentinel-2 bands used in the study (European Space Agency, 2015).

| Spatial resolution (m) | Band number | Sentinel-2                     |                         |                |
|------------------------|-------------|--------------------------------|-------------------------|----------------|
|                        |             | Band name                      | Central wavelength (nm) | Bandwidth (nm) |
| 10                     | 2           | Blue                           | 490                     | 65             |
|                        | 3           | Green                          | 560                     | 35             |
|                        | 4           | Red                            | 665                     | 30             |
|                        | 8           | Near infrared (NIR)            | 842                     | 115            |
| 20                     | 5           | Red-edge 1 (RE1)               | 705                     | 15             |
|                        | 6           | Red-edge 2 (RE2)               | 740                     | 15             |
|                        | 7           | Red-edge 3 (RE3)               | 783                     | 20             |
|                        | 8a          | Red-edge 4 (RE4) or NIR narrow | 865                     | 20             |
|                        | 11          | Shortwave infrared 1           | 1610                    | 90             |
|                        | 12          | Shortwave infrared 2           | 2190                    | 180            |

### 1.3. Image classification, post classification analysis and accuracy assessment

Image classification was undertaken in two different band combination layer stacks. This helped to improve the accuracy and utilize the vegetation class differentiation resulting from RESAVI index and further reducing spectral confusion. Band combination 1 (BC 1) (7 bands) comprised of three visible, one NIR, two SWIR and one selected RE 1 band while Band combination 2 (BC 2) (8 bands) comprised of additional RESAVI band to extract vegetation classes. A supervised maximum likelihood classification (MLC) was carried out in ERDAS Imagine 2020 to obtain different land cover classes (each class composition depends on the configuration of the respective city). Table S5 describes the land cover classes classified with respect to each city. A mask of all urbanized classes except vegetation classes (agriculture, marshy vegetation (in case of Srinagar only) and green cover areas such as urban forest, parks, recreational areas etc.) was created using the BC1 classification result in ArcGIS 10.7. Next, the vegetation classes were classified using BC 2 by excluding the masked area. The final classified image was prepared by merging the above two results. Furthermore, post classification processing was carried out to improve the classification result based on local expert knowledge using Google Earth images as the reference base map. A digitized mask of the main urban region was developed to reclassify any pixel classified into agriculture or fallow land to green infrastructure or barren land respectively. Smaller creeks, running through dense urban areas were also carefully digitized.

Accuracy assessment was carried out using a stratified random distribution method which generates testing sites for each class (approximately 40% of reference sites) using probability proportional to size (PPS) sampling. The validity of each site was validated with reference to Google Earth™ and local knowledge of the study sites. Table S5 provides the user's accuracy (UA), producer's accuracy (PA), overall accuracy (OA) and kappa (K) coefficient statistics generated from the error matrix, and it was used to assess the accuracy of land use land cover (LULC) classification results for each city.

Table S5 LULC classes of each city and their respective accuracy assessment (producer's and user's accuracy in %), overall accuracy (in %) and kappa coefficient.

| LULC classes       | Producer's acc. | User's acc. |
|--------------------|-----------------|-------------|
| Srinagar           |                 |             |
| Barren land        | 70.83           | 73.91       |
| Built-up dense     | 92.31           | 92.31       |
| Built-up sparse    | 91.67           | 75.86       |
| Fallow land        | 85.00           | 94.44       |
| Marshy vegetation* | 100.00          | 100.00      |
| River*             | 100.00          | 100.00      |
| Sealed surface     | 100.00          | 88.89       |
| Forest/Tree clad*  | 78.57           | 88.00       |
| Wetlands*          | 100.00          | 81.82       |
| Canals*            | 77.78           | 87.50       |
| Agriculture*       | 86.36           | 90.48       |
| Overall accuracy   | 86.52           |             |
| Kappa coefficient  | 0.8489          |             |
| Shimla             |                 |             |
| Barren land        | 91.67           | 88.00       |
| Built-up dense     | 90.91           | 80.00       |
| Built-up sparse    | 76.67           | 85.19       |
| Forest/Tree clad*  | 95.45           | 97.67       |
| Overall accuracy   | 89.17           |             |
| Kappa coefficient  | 0.8521          |             |
| Dehradun           |                 |             |
| Barren land        | 90.91           | 83.33       |
| Built-up dense     | 95.65           | 81.48       |
| Built-up sparse    | 76.67           | 82.14       |
| Fallow land        | 84.62           | 91.67       |
| Forest/Tree clad*  | 88.00           | 84.62       |
| Canals*            | 100.00          | 80.00       |
| Agriculture*       | 77.78           | 100.00      |
| Other vegetation * | 84.62           | 91.67       |
| Overall accuracy   | 85.82           |             |
| Kappa coefficient  | 0.8341          |             |

- UGI class

Table S6 Details of landscape metrics selected in the study, after McGarigal and Marks, 1995; McGarigal, 2015.

| Metrics                                              | Formula                                                                                                                                                                                                                                                                          | Range                                                                  |
|------------------------------------------------------|----------------------------------------------------------------------------------------------------------------------------------------------------------------------------------------------------------------------------------------------------------------------------------|------------------------------------------------------------------------|
| Largest patch index (LPI)                            | $LPI = \frac{\max_{j=1}^n (a_{ij})}{A} (100)$ $a_{ij}$ = area ( $m^2$ ) of largest patch ij<br>A= total landscape area ( $m^2$ )                                                                                                                                                 | $0 < LPI \leq 100$                                                     |
| Mean Patch Size (AREA_MN)                            | $AREA\_MN = \frac{\sum_{j=1}^n a_{ij} (1/10000)}{n_i}$ $a_{ij}$ = area ( $m^2$ ) of patch ij<br>$n_i$ = number of patches in the landscape class i                                                                                                                               | AREA_MN > 0, without limit                                             |
| Edge Density (ED)                                    | $ED = \frac{\sum_{k=1}^m e_{ik}}{A} (10000)$ $e_{ik}$ = total length (m) of edge in landscape involving class i<br>A = total landscape area ( $m^2$ )                                                                                                                            | ED ≥ 0, no limit                                                       |
| Landscape Shape Index (LSI)                          | $LSI = \frac{0.25 \sum_{k=1}^m e_{ik}}{\sqrt{A}}$ $e_{ik}$ = total length (m) of edge in landscape between patch types (classes) i and k; includes the entire landscape boundary and some or all background edge segments involving class i<br>A= total landscape area ( $m^2$ ) | LSI ≥ 1, without limit                                                 |
| Area-Weighted Mean Patch Fractal Dimension (FRAC_AM) | $FRAC\_AM = \sum_{j=1}^n \left[ \left( \frac{2 \ln(0.25 p_{ij})}{\ln a_{ij}} \right) \right] \left[ \frac{a_{ij}}{\sum_{j=1}^n a_{ij}} \right]$ $P_{ij}$ =Perimeter (m) of patch ij<br>$a_{ij}$ = area ( $m^2$ ) of patch ij                                                     | $1 \leq FRAC\_AM \leq 2$                                               |
| Contiguity Index (CONTIG)                            | $CONTIG = \frac{\left[ \frac{\sum_{r=1}^z c_{ijr}}{a_{ij}} \right] - 1}{v - 1}$ $c_{ijr}$ = contiguity value for pixel r in patch ij<br>v = sum of the values in a 3-by-3 cell template<br>$a_{ij}$ = area ( $m^2$ ) of patch ij in terms of number of cells                     | $0 \leq CONTIG \leq 1$                                                 |
| Mean Euclidean Nearest-Neighbour distance (ENN_MN)   | $ENN\_MN = \frac{\sum_{j=1}^n h_{ij}}{n_i}$ $h_{ij}$ = distance (m) from patch ij to nearest neighboring patch of the class, based on patch edge-to-edge distance, computed from cell center to cell center                                                                      | MNN > 0, no limit                                                      |
| Effective Mesh Size (MESH)                           | $MESH = \frac{\sum_{j=1}^n a_{ij}^2}{A} \left( \frac{1}{10,000} \right)$ $a_{ij}$ = area ( $m^2$ ) of patch ij<br>A = total landscape area ( $m^2$ )                                                                                                                             | Ratio of cell size to landscape area ≤ MESH ≤ total landscape area (A) |
| Patch Density (PD)                                   | $PD = \frac{n_i}{A} (10000) (100)$ $n_i$ = number of patches in the landscape class i<br>A = total landscape area ( $m^2$ )                                                                                                                                                      | PD > 0, constrained by cell size                                       |

Table S7 Step-wise regression with multicollinearity test for Srinagar. UGIQ is the dependent variable.

| Model |            | Unstandardized Coefficients |            | Standardized Coefficients | Collinearity Statistics |       |
|-------|------------|-----------------------------|------------|---------------------------|-------------------------|-------|
|       |            | B                           | Std. Error | Beta                      | Tolerance               | VIF   |
| 1     | (Constant) | .000                        | 0.604      |                           |                         |       |
|       | FRAC_AM    | 11.361                      | 0.604      | 0.917                     | 1.000                   | 1.000 |
| 2     | (Constant) | .000                        | 0.512      |                           |                         |       |
|       | FRAC_AM    | 10.535                      | 0.536      | 0.850                     | 0.913                   | 1.096 |
|       | AREA_MN    | 2.795                       | 0.536      | 0.226                     | 0.913                   | 1.096 |
| 3     | (Constant) | .000                        | 0.252      |                           |                         |       |
|       | FRAC_AM    | 6.061                       | 0.408      | 0.489                     | 0.382                   | 2.617 |
|       | AREA_MN    | 3.989                       | 0.277      | 0.322                     | 0.831                   | 1.204 |
|       | ED         | 5.608                       | 0.390      | 0.453                     | 0.418                   | 2.390 |
| 4     | (Constant) | .000                        | 0.215      |                           |                         |       |
|       | FRAC_AM    | 5.957                       | 0.348      | 0.481                     | 0.381                   | 2.626 |
|       | AREA_MN    | 4.001                       | 0.236      | 0.323                     | 0.831                   | 1.204 |
|       | ED         | 4.126                       | 0.443      | 0.333                     | 0.236                   | 4.243 |
|       | LSI        | 1.902                       | 0.375      | 0.153                     | 0.328                   | 3.051 |
| 5     | (Constant) | .000                        | 0.175      |                           |                         |       |
|       | FRAC_AM    | 4.940                       | 0.334      | 0.399                     | 0.275                   | 3.635 |
|       | AREA_MN    | 2.578                       | 0.312      | 0.208                     | 0.315                   | 3.177 |
|       | ED         | 3.627                       | 0.371      | 0.293                     | 0.223                   | 4.485 |
|       | LSI        | 2.601                       | 0.329      | 0.210                     | 0.284                   | 3.527 |
|       | LPI        | 2.222                       | 0.384      | 0.179                     | 0.208                   | 4.814 |
| 6     | (Constant) | .000                        | 0.104      |                           |                         |       |
|       | FRAC_AM    | 3.918                       | 0.219      | 0.316                     | 0.224                   | 4.462 |
|       | AREA_MN    | 1.816                       | 0.198      | 0.147                     | 0.275                   | 3.637 |
|       | ED         | 2.245                       | 0.254      | 0.181                     | 0.167                   | 5.999 |
|       | LSI        | 3.151                       | 0.202      | 0.254                     | 0.265                   | 3.767 |
|       | LPI        | 2.863                       | 0.235      | 0.231                     | 0.195                   | 5.139 |
|       | ENN_MN     | -2.031                      | 0.188      | -0.164                    | 0.306                   | 3.268 |
| 7     | (Constant) | .000                        | 0.000      |                           |                         |       |
|       | FRAC_AM    | 2.882                       | 0.000      | 0.233                     | 0.165                   | 6.069 |
|       | AREA_MN    | 1.842                       | 0.000      | 0.149                     | 0.275                   | 3.638 |
|       | ED         | 3.341                       | 0.000      | 0.270                     | 0.128                   | 7.797 |
|       | LSI        | 2.988                       | 0.000      | 0.241                     | 0.263                   | 3.807 |
|       | LPI        | 1.897                       | 0.000      | 0.153                     | 0.153                   | 6.536 |
|       | ENN_MN     | -3.048                      | 0.000      | -0.246                    | 0.208                   | 4.817 |
|       | PD         | -1.657                      | 0.000      | -0.134                    | 0.243                   | 4.110 |

Table S8 Step-wise regression with multicollinearity test for Shimla. UGIQ is the dependent variable.

| Model |            | Unstandardized Coefficients |            | Standardized Coefficients | Collinearity Statistics |       |
|-------|------------|-----------------------------|------------|---------------------------|-------------------------|-------|
|       |            | B                           | Std. Error | Beta                      | Tolerance               | VIF   |
| 1     | (Constant) | .000                        | 0.620      |                           |                         |       |
|       | LPI        | 8.852                       | 0.620      | 0.948                     | 1.000                   | 1.000 |
| 2     | (Constant) | .000                        | 0.328      |                           |                         |       |
|       | LPI        | 6.217                       | 0.472      | 0.666                     | 0.482                   | 2.073 |
|       | AREA_MN    | 3.662                       | 0.472      | 0.392                     | 0.482                   | 2.073 |
| 3     | (Constant) | .000                        | 0.212      |                           |                         |       |
|       | LPI        | 5.114                       | 0.364      | 0.548                     | 0.341                   | 2.929 |
|       | AREA_MN    | 3.419                       | 0.309      | 0.366                     | 0.473                   | 2.114 |

|   |            |        |      |        |       |       |
|---|------------|--------|------|--------|-------|-------|
|   | ENN_MN     | -1.755 | .313 | -0.188 | 0.461 | 2.169 |
| 4 | (Constant) | .000   | .149 |        |       |       |
|   | LPI        | 4.422  | .293 | 0.474  | 0.258 | 3.876 |
|   | AREA_MN    | 2.812  | .251 | 0.301  | 0.352 | 2.844 |
|   | ENN_MN     | -1.991 | .225 | -0.213 | 0.439 | 2.279 |
|   | ED         | -1.268 | .265 | -0.136 | 0.315 | 3.178 |
| 5 | (Constant) | .000   | .000 |        |       |       |
|   | LPI        | 2.785  | .000 | 0.298  | 0.101 | 9.932 |
|   | AREA_MN    | 2.698  | .000 | 0.289  | 0.348 | 2.874 |
|   | ENN_MN     | -2.407 | .000 | -0.258 | 0.374 | 2.670 |
|   | ED         | -2.666 | .000 | -0.285 | 0.132 | 7.597 |
|   | FRAC_AM    | 1.166  | .000 | 0.125  | 0.325 | 3.073 |

Table S9 Step-wise regression with multicollinearity test for Dehradun. UGIQ is the dependent variable.

|   | Model      | Unstandardized Coefficients |            | Standardized Coefficients | Collinearity Statistics |       |
|---|------------|-----------------------------|------------|---------------------------|-------------------------|-------|
|   |            | B                           | Std. Error | Beta                      | Tolerance               | VIF   |
| 1 | (Constant) | .000                        | .401       |                           |                         |       |
|   | AREA_MN    | 7.847                       | .401       | 0.932                     | 1.000                   | 1.000 |
| 2 | (Constant) | .000                        | .204       |                           |                         |       |
|   | AREA_MN    | 5.282                       | .285       | 0.627                     | 0.513                   | 1.949 |
|   | FRAC_AM    | 3.674                       | .285       | 0.436                     | 0.513                   | 1.949 |
| 3 | (Constant) | .000                        | .146       |                           |                         |       |
|   | AREA_MN    | 5.190                       | .204       | 0.616                     | 0.511                   | 1.957 |
|   | FRAC_AM    | 3.425                       | .207       | 0.407                     | 0.500                   | 2.002 |
|   | CONTIG_MN  | 1.134                       | .152       | 0.135                     | 0.920                   | 1.087 |
| 4 | (Constant) | .000                        | .084       |                           |                         |       |
|   | AREA_MN    | 2.917                       | .244       | 0.347                     | 0.119                   | 8.371 |
|   | FRAC_AM    | 3.050                       | .124       | 0.362                     | 0.459                   | 2.177 |
|   | CONTIG_MN  | 1.311                       | .089       | 0.156                     | 0.888                   | 1.126 |
|   | LPI        | 2.665                       | .251       | 0.317                     | 0.113                   | 8.824 |
| 5 | (Constant) | .000                        | .000       |                           |                         |       |
|   | AREA_MN    | 2.868                       | .000       | 0.341                     | 0.119                   | 8.377 |
|   | FRAC_AM    | 2.393                       | .000       | 0.284                     | 0.305                   | 3.279 |
|   | CONTIG_MN  | .993                        | .000       | 0.118                     | 0.722                   | 1.384 |
|   | LPI        | 2.929                       | .000       | 0.348                     | 0.111                   | 9.001 |
|   | LSI        | .929                        | .000       | 0.110                     | 0.454                   | 2.204 |
